# Supplementary material
Source: PubMed Central journal article supplement (PMC4282182)
Supplement: NIHMS629750-supplement-Related_Manuscript_File.pdf [file NIHMS629750-supplement-Related_Manuscript_File.pdf]

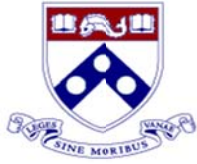

UNIVERSITY *of*  
PENNSYLVANIA

**Charles C. Branas, PhD**  
*Professor*  
School of Medicine  
Department of Biostatistics and Epidemiology

---

August 21, 2014

To the Editor:

This letter grants permission to Michael T. Mullen, MD to use an image which was adapted from [www.strokemaps.org](http://www.strokemaps.org) in his manuscript titled: "Disparities in Accessibility of Certified Primary Stroke Centers." We own this website and grant full permission for this image to be published in the academic journal *Stroke*.

Sincerely,

*Charles C. Branas*

Charles Branas, PhD
