# Supplementary material
Source: PubMed Central journal article supplement (PMC4282182)
Supplement: NIHMS629750-supplement-Supplemental_Material.pdf [file NIHMS629750-supplement-Supplemental_Material.pdf]

Online Supplement

Disparities in Accessibility of Primary Stroke Centers

Supplemental Table/Figures

### **I. Modified Rural-Urban Continuum Codes Defined**

| Code | Definition                                                                     |
|------|--------------------------------------------------------------------------------|
| 0    | Central counties of metropolitan areas of 1 million population or more         |
| 1    | Fringe counties of metropolitan areas of 1 million population or more          |
| 2    | Counties of metropolitan areas of 250,000 to 1 million population              |
| 3    | Counties in metropolitan areas of fewer than 250,000 population                |
| 4    | Adjacent to a metropolitan area, urban population of 20,000 or more            |
| 5    | Not adjacent to a metropolitan area, urban population of 20,000 or more        |
| 6    | Adjacent to a metropolitan area, urban population of 2,500-19,999              |
| 7    | Not adjacent to a metropolitan area, urban population of 2,500-19,9000         |
| 8    | Adjacent to a metropolitan area, rural or less than 2,500 urban population     |
| 9    | Not-adjacent to a metropolitan area, rural or less than 2,500 urban population |

## II. Demographic Variables, including source, geographic unit, and year.

|                                                                                            | Source                    | Geographic Unit | Year      | All Block Groups in the USA |                     |
|--------------------------------------------------------------------------------------------|---------------------------|-----------------|-----------|-----------------------------|---------------------|
|                                                                                            |                           |                 |           | Median                      | Interquartile Range |
| <b>Income</b>                                                                              |                           |                 |           |                             |                     |
| Per Capita Income                                                                          | Neilson/Claritas          | Block Group     | 2010      | \$23,139                    | \$17,551 - \$31,060 |
| Per Capita Income                                                                          | American Community Survey | Block Group     | 2005-2009 | \$23,208                    | \$17,312 - \$31,369 |
| Median Household Income                                                                    | American Community Survey | Block Group     | 2005-2009 | \$48,125                    | \$34,632 - \$66,904 |
| Median Family Income                                                                       | American Community Survey | Block Group     | 2005-2009 | \$57,404                    | \$41,552 - \$79,010 |
| <b>Poverty</b>                                                                             |                           |                 |           |                             |                     |
| % Population Under 18 Living in Poverty                                                    | American Community Survey | Census Tract    | 2005-2009 | 15.2%                       | 5.9% - 29.1%        |
| % Population 18 to 64 Living in Poverty                                                    | American Community Survey | Census Tract    | 2005-2009 | 10.7%                       | 5.8% - 18.2%        |
| % Population 65 and Over Living in Poverty                                                 | American Community Survey | Census Tract    | 2005-2009 | 8.2%                        | 3.8% - 14.8%        |
| % Total Population Living in Poverty                                                       | American Community Survey | Census Tract    | 2005-2009 | 11.5%                       | 6.1% - 19.6%        |
| % of Households Receiving Public Assistance Income                                         | American Community Survey | Block Group     | 2005-2009 | 0.5%                        | 0.0% - 3.6%         |
| % of Families with Income Below the Poverty Level                                          | American Community Survey | Block Group     | 2005-2009 | 6.6%                        | 0.0% - 16.5%        |
| <b>Insurance Status</b>                                                                    |                           |                 |           |                             |                     |
| % Under 19 without Health Insurance                                                        | Area Resource File        | County          | 2010      | 7.1%                        | 5.4 - 11.0%         |
| % Under 65 without Health Insurance                                                        | Area Resource File        | County          | 2010      | 16.3%                       | 12.7% - 20.2%       |
| <b>CMS Eligibles</b>                                                                       |                           |                 |           |                             |                     |
| % Eligible for Medicare                                                                    | Area Resource File        | County          | 2008      | 14.9%                       | 12.3% - 17.5%       |
| % Eligible for Medicaid                                                                    | Area Resource File        | County          | 2008      | 19.0%                       | 14.2% - 24.6%       |
| <b>Education - Dropouts</b>                                                                |                           |                 |           |                             |                     |
| % Population 25 or Over with Less than High School Degree                                  | American Community Survey | Block Group     | 2005-2009 | 13.00%                      | 6.2% - 23.4%        |
| % Population 25 or Over with Some College Education                                        | American Community Survey | Block Group     | 2005-2009 | 27.20%                      | 20.3% - 34.0%       |
| <b>Education - Degrees</b>                                                                 |                           |                 |           |                             |                     |
| % Population 25 or Over, High School Graduate                                              | American Community Survey | Block Group     | 2005-2009 | 30.8%                       | 21.2% - 39.9%       |
| % Population 25 or Over, Bachelors Degree                                                  | American Community Survey | Block Group     | 2005-2009 | 13.5%                       | 7.1% - 22.8%        |
| % Population 25 or Over, Master's Degree                                                   | American Community Survey | Block Group     | 2005-2009 | 4.5%                        | 1.6% - 9.4%         |
| % Population 25 or Over, Professional Degree                                               | American Community Survey | Block Group     | 2005-2009 | 0.3%                        | 0.0% - 2.3%         |
| % Population 25 or Over, Doctoral Degree                                                   | American Community Survey | Block Group     | 2005-2009 | 0.0%                        | 0.0% - 1.3%         |
| <b>Employment</b>                                                                          |                           |                 |           |                             |                     |
| % in Labor Force who are Employed                                                          | Neilson/Claritas          | Block Group     | 2010      | 94.60%                      | 90.8% - 97.1%       |
| <b>Race</b>                                                                                |                           |                 |           |                             |                     |
| % Black                                                                                    | Neilson/Claritas          | Block Group     | 2010      | 2.7%                        | 0.6% - 12.9%        |
| % Non-White                                                                                | Neilson/Claritas          | Block Group     | 2010      | 16.0%                       | 5.6% - 43.6%        |
| <b>Ethnicity &amp; Origin</b>                                                              |                           |                 |           |                             |                     |
| % Hispanic                                                                                 | Neilson/Claritas          | Block Group     | 2010      | 4.4%                        | 1.6% - 15.4%        |
| % Foreign-Born                                                                             | Neilson/Claritas          | Block Group     | 2010      | 5.9%                        | 2.0% - 15.4%        |
| <b>Healthcare Utilization</b>                                                              |                           |                 |           |                             |                     |
| Total Hospital Admissions per 1,000 Population                                             | Area Resource File        | County          | 2010      | 118.9                       | 83.0 - 166.2        |
| Total Hospital Beds per 1,000 Population                                                   | Area Resource File        | County          | 2010      | 2.9                         | 2.0 - 4.1           |
| Total Hospital Inpatient Days Per 1,000 Population                                         | Area Resource File        | County          | 2010      | 739.2                       | 439.2 - 1054.0      |
| Total Hospital ED Visits per 1,000 Population                                              | Area Resource File        | County          | 2010      | 398.3                       | 278.7 - 524.3       |
| <b>Healthcare Resources - Doctors</b>                                                      |                           |                 |           |                             |                     |
| Non-Federal MDs in Neurology Devoted to Total Patient Care per 100,000 Population          | Area Resource File        | County          | 2010      | 3.9                         | 1.6 - 6.2           |
| Non-Federal MDs in Emergency Medicine Devoted to Total Patient Care per 100,000 Population | Area Resource File        | County          | 2010      | 9.7                         | 5.0 - 13.9          |
|                                                                                            |                           |                 |           |                             | 1.1-2.6             |
|                                                                                            |                           |                 |           |                             | 0.0 - 0.0           |
| Per Capita STG Hospitals With ED                                                           | Area Resource File        | County          | 2008      | 0.8                         | 0.6-1.5             |

### III. Major City Multivariable Model Results

---

|                                   | <b>Coefficient</b> | <b>95% CI</b>        | <b>P-Value</b> |
|-----------------------------------|--------------------|----------------------|----------------|
| Income                            | 1.315              | (1.096 - 1.579)      | 0.003          |
| Poverty                           | 0.709              | (0.595 - 0.845)      | <0.001         |
| Uninsured                         | 957.525            | (391.664 - 2340.918) | <0.001         |
| Medicare and/or Medicaid Eligible | 0.042              | (0.027 - 0.065)      | <0.001         |
| Education: Degrees                | 2.291              | (1.706 - 3.077)      | <0.001         |
| Education: Dropouts               | 0.836              | (0.769 - 0.908)      | <0.001         |
| Black and non-White               | 2.569              | (2.059 - 3.205)      | <0.001         |
| Hispanic and Foreign Born         | 4.855              | (3.360 - 7.016)      | <0.001         |
| Healthcare Utilization            | 19.156             | (12.643 - 29.022)    | <0.001         |
| Resources: Hospitals              | 0.000              | (0.000 - 0.000)      | <0.001         |
| Resources: Physicians             | 4.282              | (3.770 - 4.865)      | <0.001         |
| Percent Employed                  | 1.015              | (1.006 - 1.024)      | 0.001          |
| Stroke Belt Location              | 0.001              | (0.000 - 0.003)      | <0.001         |
| Rural-Urban Continuum Code        | 0.001              | (0.000 - 0.002)      | <0.001         |

---

### IV. Minor City Multivariable Model Results

---

|                                   | <b>Coefficient</b> | <b>95% CI</b>   | <b>P-Value</b> |
|-----------------------------------|--------------------|-----------------|----------------|
| Income                            | 0.983              | (0.807 - 1.199) | 0.867          |
| Poverty                           | 1.141              | (0.998 - 1.303) | 0.053          |
| Uninsured                         | 0.811              | (0.672 - 0.978) | 0.028          |
| Medicare and/or Medicaid Eligible | 0.405              | (0.356 - 0.459) | <0.001         |
| Education: Degrees                | 2.095              | (1.706 - 2.573) | <0.001         |
| Education: Dropouts               | 0.813              | (0.743 - 0.888) | <0.001         |
| Black and non-White               | 2.086              | (1.630 - 2.670) | <0.001         |
| Hispanic and Foreign Born         | 1.788              | (1.286 - 2.485) | 0.001          |
| Healthcare Utilization            | 2.552              | (2.234 - 2.915) | <0.001         |
| Resources: Hospitals              | 0.474              | (0.376 - 0.596) | <0.001         |
| Resources: Physicians             | 4.106              | (3.305 - 5.101) | <0.001         |
| Percent Employed                  | 1.014              | (1.000 - 1.027) | 0.048          |
| Stroke Belt Location              | 0.567              | (0.420 - 0.766) | <0.001         |
| Rural-Urban Continuum Code        | 0.119              | (0.089 - 0.160) | <0.001         |

---

## V. Suburbs Multivariable Model Results

|                                   | <b>Coefficient</b> | <b>95% CI</b>   | <b>P-Value</b> |
|-----------------------------------|--------------------|-----------------|----------------|
| Income                            | 0.553              | (0.413 - 0.740) | <0.001         |
| Poverty                           | 0.839              | (0.699 - 1.007) | 0.059          |
| Uninsured                         | 0.637              | (0.514 - 0.789) | <0.001         |
| Medicare and/or Medicaid Eligible | 0.655              | (0.594 - 0.724) | <0.001         |
| Education: Degrees                | 2.352              | (1.715 - 3.227) | <0.001         |
| Education: Dropouts               | 0.752              | (0.663 - 0.853) | <0.001         |
| Black and non-White               | 1.770              | (1.411 - 2.219) | <0.001         |
| Hispanic and Foreign Born         | 1.425              | (0.926 - 2.194) | 0.108          |
| Healthcare Utilization            | 2.246              | (2.015 - 2.503) | <0.001         |
| Resources: Hospitals              | 0.326              | (0.272 - 0.390) | <0.001         |
| Resources: Physicians             | 1.604              | (1.456 - 1.766) | <0.001         |
| Percent Employed                  | 1.021              | (1.001 - 1.040) | 0.04           |
| Stroke Belt Location              | 2.678              | (2.170 - 3.307) | <0.001         |
| Rural-Urban Continuum Code        | 0.740              | (0.688 - 0.796) | <0.001         |
